# Supplementary material for: Impact of sitting at work on musculoskeletal complaints of German workers - results from the study on mental health at work (S-MGA)
Source: PubMed Central journal article supplement (PMC10967152; doi:10.1186/s12995-024-00408-7), 2024-03-27

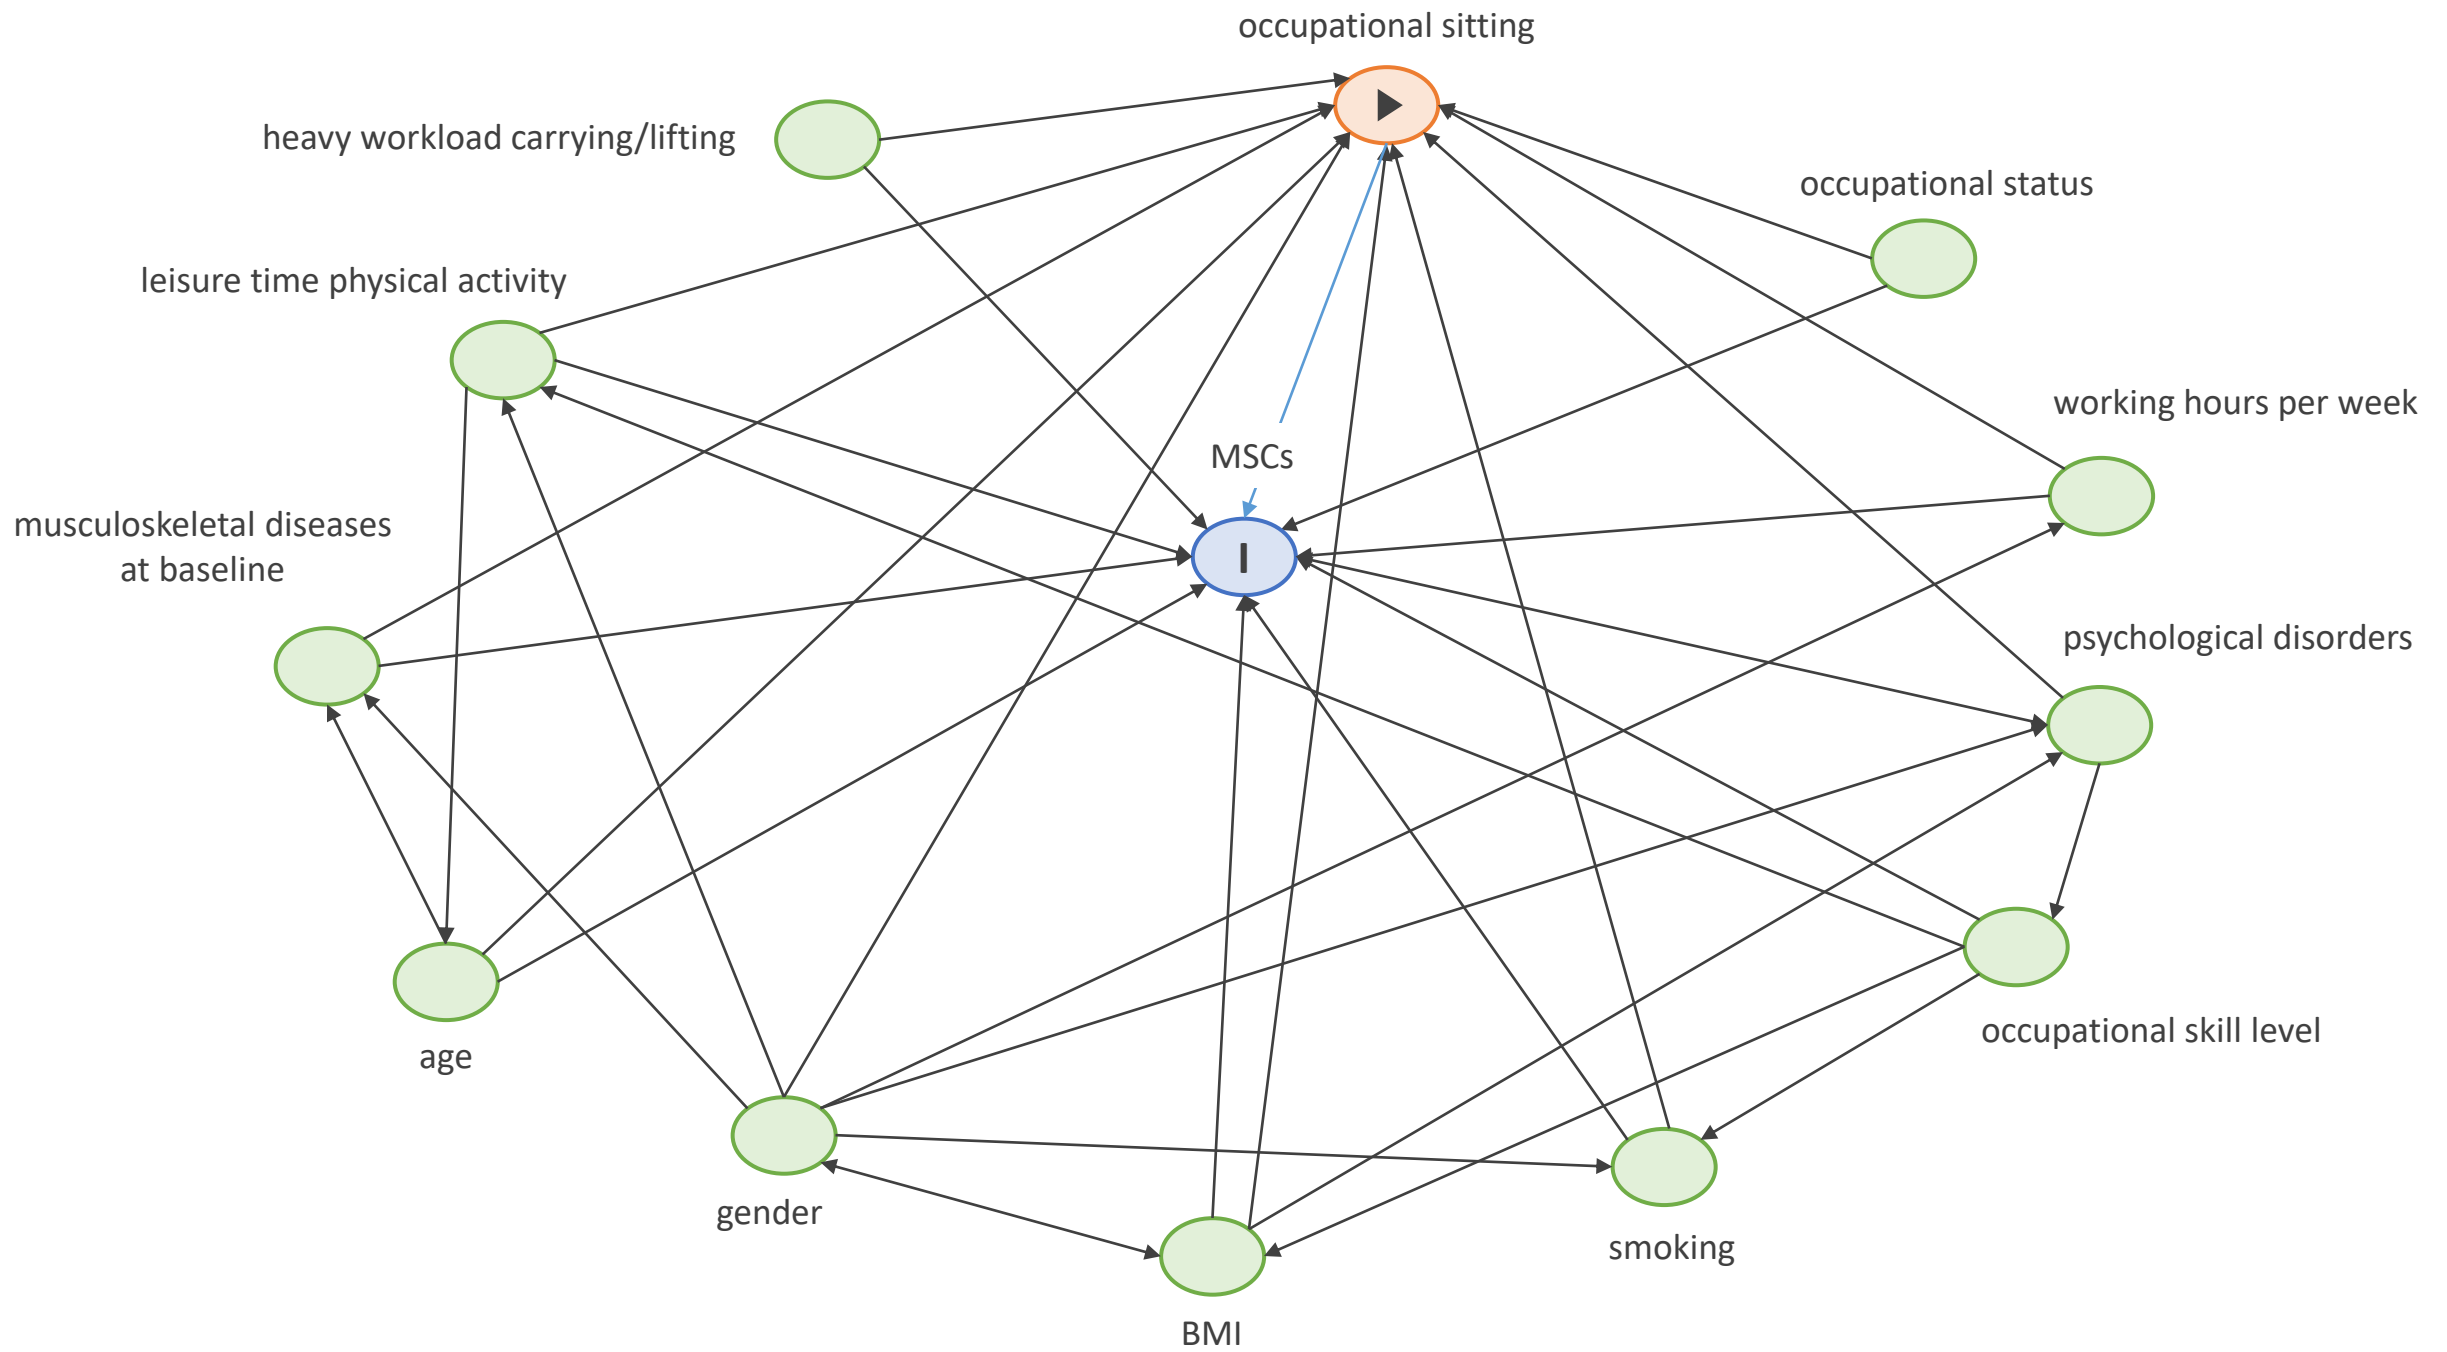

Supplement: 12995_2024_408_MOESM1_ESM.pdf [file 12995_2024_408_MOESM1_ESM.pdf]
